# Supplementary material for: Microfluidic cellular enrichment and separation through differences in viscoelastic deformation
Source: Royal Society of Chemistry journal article supplement (doi:10.1039/c4lc01150c), 2014-11-11
Supplement: c4lc01150c1.pdf [file c4lc01150c1.pdf]

**Supplementary Fig. 1** K562 cell lateral displacement at the first ridge for 5 different gap sizes,  $h$ . The smaller gap size forces cells to transit along the edge of the ridge due to large compressive strains.

**Supplementary Video 1** Video showing the K562 and HL60 cell trajectories at the channel outlets. The video was taken at 2900 frames per second.
