# Supplementary figures and images for: Microfluidic cellular enrichment and separation through differences in viscoelastic deformation
Source: Royal Society of Chemistry journal article supplement (doi:10.1039/c4lc01150c), 2014-11-11

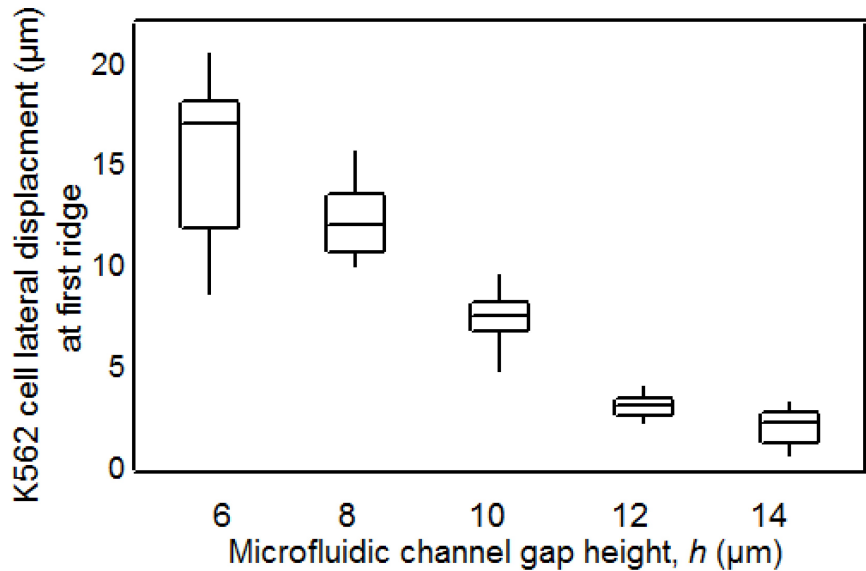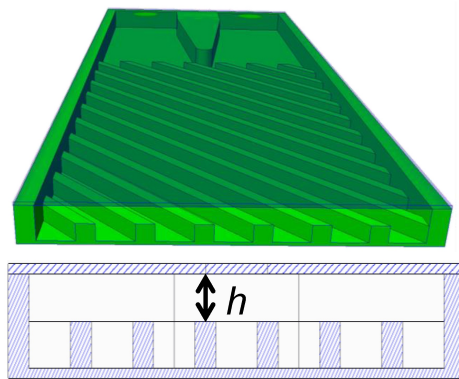

Supplement: c4lc01150c2.pdf [file c4lc01150c2.pdf]
